# Supplementary material
Source: publisher figshare collection journal article supplement (https://karger.figshare.com/ndownloader/files/13151513)
Supplement: Supplementary file 1 [file 13151513]

**Supplementary Table A.1** – Group differences in the Δscore of the Short Form 36 (SF-36) at 3 months (compared to the results at the time of inclusion) for the incomplete (n=7) and complete (n=7) transurethral resection group.

| SF-36 | | | |  |
| --- | --- | --- | --- | --- |
|  | **Complete TURBT**  **Δscore**  **mean (SD)** | | **Incomplete TURBT**  **Δscore**  **mean (SD)** | ***p*-value** |
| Physical functioning | -7.9 (9.5) | -15.7 (25.4) | | 0.95 |
| Role functioning -*physicial* | -7.2 (31.3) | 4.2 (10.2) | | 0.22 |
| Role functioning -*emotional* | -5.6 (13.6) | 0 (0) | | 0.32 |
| Bodily pain | 1.5 (7.0) | 4.7 (15.6) | | 0.54 |
| General health perceptions | -4.3 (6.1) | 2.9 (19.6) | | 0.60 |
| Health change | 7.1 (23.8) | 4.2 (18.8) | | 0.95 |
| Vitality | -9.3 (9.3) | -17.8 (8.1) | | 0.079 |
| Social functioning | -5.4 (9.8) | -3.6 (6.0) | | 0.054 |
| Mental health | 5.7 (13.8) | 7.4 (5.4) | | 0.48 |

SD=standard deviation
